# Supplementary material for: Characterization of the Triacylglycerol Fraction of Italian and Extra-European Hemp Seed Oil
Source: MDPI journal article supplement (doi:10.3390/foods10050916), 2021-04-22
Supplement: s1 [file s1]

# Characterization of Triacylglycerol Fraction of Italian and Extra-European Hemp Seed Oil

Carmela Tringaniello <sup>1</sup>, Lina Cossignani <sup>1,2\*</sup> and Francesca Blasi <sup>1</sup>

<sup>1</sup> University of Perugia, Department of Pharmaceutical Sciences, 06100 Perugia (Italy); carmela.tringaniello@unipg.it (C.T.); francesca.blasi@unipg.it (F.B.); lina.cossignani@unipg.it (L.C.)

<sup>2</sup> Center for Perinatal and Reproductive Medicine, University of Perugia, Santa Maria della Misericordia University Hospital, Sant'Andrea delle Fratte, 06132 Perugia, Italy

\* Correspondence: lina.cossignani@unipg.it (L.C.); Tel.: +39-755857959

## SUPPLEMENTARY MATERIAL

FIGURE 1S

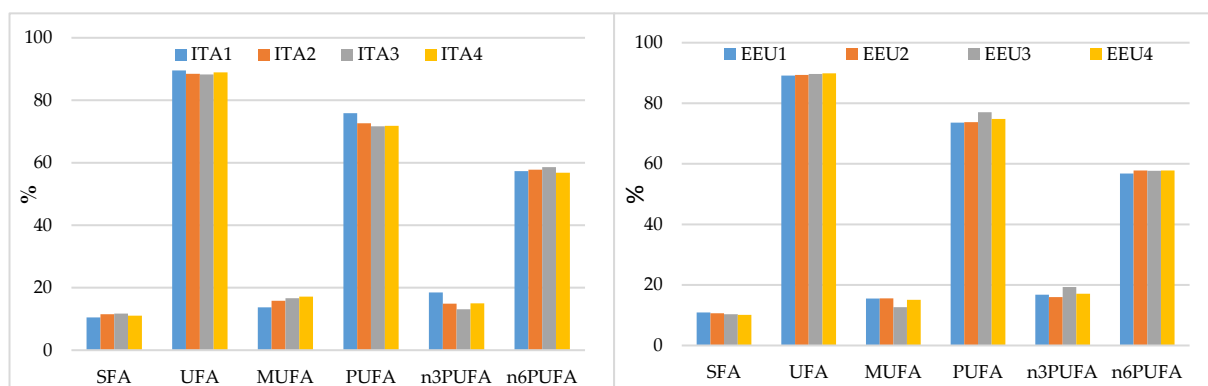

**Figure 1S.** Composition (% mol) of FA categories (SFA, UFA, MUFA, PUFA, n3PUFA, n6PUFA) of the HSO samples. ITA1-4, Italian samples; EEU, Extra-European Union samples. SFA, saturated, UFA, unsaturated, MUFA, monounsaturated, PUFA, polyunsaturated fatty acids

**FIGURE 2S**

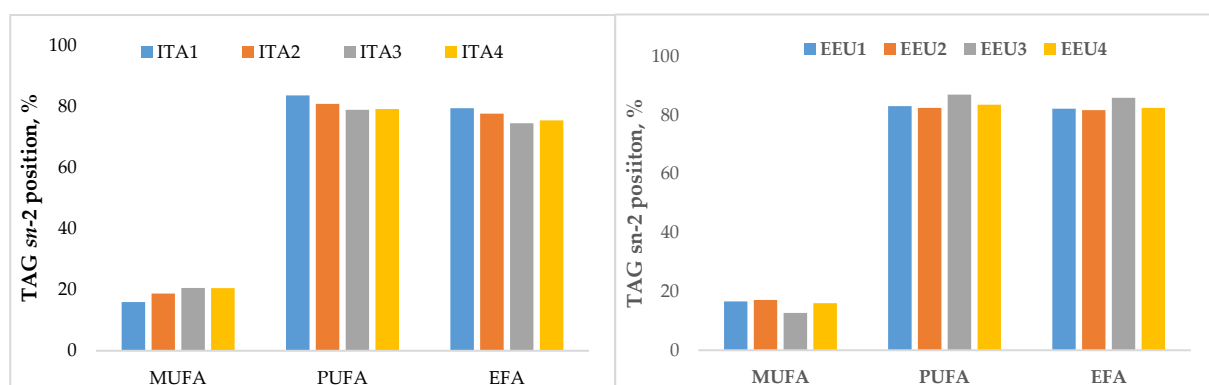

**Figure 2S.** Composition (% mol) of FA categories in TAG sn-2 position of HSO samples: ITA1-4, Italian samples; EEU1-4, Extra-European Union samples. MUFA, monounsaturated fatty acids; PUFA, polyunsaturated fatty acids; EFA, essential fatty acids
